# Supplementary material
Source: publisher figshare collection journal article supplement (https://acs.figshare.com/ndownloader/files/8178698)

**Supporting Information for:**

**Phantom Electrons in Mesoporous Nanocrystalline SnO<sub>2</sub>  
Thin Films with Cation Dependent Reduction Onsets**

Timothy J. Barr, Renato N. Sampaio, Brian N. DiMarco, Erica M. James, and Gerald J. Meyer\*

Department of Chemistry, University of North Carolina at Chapel Hill,

Chapel Hill, North Carolina, 27599, United States

**Supporting Information:**

**Derivation of Modified Beer's Law:**

| Expression                                                                                                                                          | Explanation                                                                                                                                                                                                                          |
|-----------------------------------------------------------------------------------------------------------------------------------------------------|--------------------------------------------------------------------------------------------------------------------------------------------------------------------------------------------------------------------------------------|
| $\Delta Abs = \epsilon bc$                                                                                                                          | Beer's Law                                                                                                                                                                                                                           |
| $\Delta Abs = \epsilon \left( \frac{h}{\sin\theta} \right) \left( \frac{n}{A(dm^2)h(dm)} \right)$                                                   | Substitute $b = h/\sin\theta$ and $c = n/(Ah)$ where n is moles of electrons, A is the geometric area of the cell, and h is the thickness. To hold the equality the units on A and h are $dm^2$ and dm, respectively.                |
| $\Delta Abs = \epsilon \left( \frac{h}{\sin\theta} \right) \left( \frac{n}{A(dm^2)h(dm)} \right) \frac{(1000\text{ cm}^3/L)}{(1000\text{ cm}^3/L)}$ | Multiply by $(1000\text{ cm}^3/L)/(1000\text{ cm}^3/L)$ to convert between $cm^3$ and L (or $dm^3$ ). The text in red is then combined to represent the Area and height of the film in $cm^3$ , not L. This allows h to be canceled. |
| $\Delta Abs = \frac{1000\epsilon}{\sin\theta} \left( \frac{n}{A(cm^2)} \right) \left( \frac{F}{F} \right)$                                          | Multiply by $(F/F)$ to convert moles to Coulombs, C. Combine the text in red.                                                                                                                                                        |
| $\Delta Abs = \frac{1000\epsilon}{F \sin\theta} \left( \frac{C}{A} \right)$                                                                         | Final expression. Therefore, plotting $\Delta Abs$ vs $C/A$ (A in $cm^2$ ) should give a straight line with a slope<br>$m = \frac{1000\epsilon}{F \sin\theta}$                                                                       |

b: Path length of sample probed by light

h: Film thickness

$\theta$ : Angle of film relative to light ray

A: Geometric area of the thin film

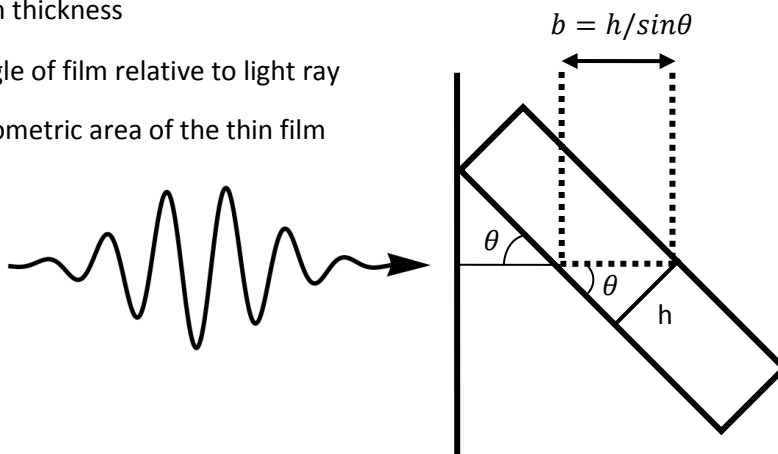

Supplement: Supplementary file 1 [file 8178698]
